# Supplementary material for: Cognitive function trajectories and their determinants in older people: 8 years of follow-up in the English Longitudinal Study of Ageing
Source: PubMed Central journal article supplement (PMC6204948; doi:10.1136/jech-2017-210116), 2018-04-24
Supplement: jech-2017-210116supp001.pdf [file jech-2017-210116supp001.pdf]

**Cognitive function trajectories and their determinants in older people: 8 years of follow-up in the English Longitudinal Study of Ageing**

*Paola Zaninotto\*<sup>1</sup>, G. David Batty<sup>1,2</sup>, Michael Allerhand<sup>2</sup>, Ian J. Deary<sup>2</sup>*

*<sup>1</sup> University College London, Research Department of Epidemiology and Public Health, London, United Kingdom*

*<sup>2</sup> Centre for Cognitive Ageing and Cognitive Epidemiology, Department of Psychology, University of Edinburgh, Edinburgh, UK*

\*Correspondence to [p.zaninotto@ucl.ac.uk](mailto:p.zaninotto@ucl.ac.uk)

**Table S1 Adjusted<sup>a</sup> estimates for the effect of gender on the intercepts and slopes of each cognitive function domain**

|                                     | <b>Estimate (s.e.)</b> |
|-------------------------------------|------------------------|
| <b>Memory Intercept</b>             | 0.194 (0.015)***       |
| <b>Memory Slope</b>                 | 0.011 (0.006)*         |
| <b>Executive function Intercept</b> | -0.078 (0.017)***      |
| <b>Executive function Slope</b>     | 0.012 (0.006)*         |
| <b>Processing Speed Intercept</b>   | 0.324 (0.017)***       |
| <b>Processing Speed Slope</b>       | 0.008 (0.006)          |
| <b>Global CF Intercept</b>          | 0.145 (0.013)***       |
| <b>Global CF Slope</b>              | 0.016 (0.004)***       |

a. Adjusted for age, education, wealth, and childhood socioeconomic status, cardiovascular disease, diabetes, limitations with activities of daily living, poor mobility, BMI, physical activity, alcohol, and smoking, depression, and dementia

**Table S2. Summary characteristics of participants who completed all waves of the study (n=4157): the English Longitudinal Study of Ageing, 2002-2003 to 2010-2011**

|                                                |                  | <b>Men</b><br>(n= 1,825) |                  | <b>Women</b><br>(n=2,332) |
|------------------------------------------------|------------------|--------------------------|------------------|---------------------------|
| <b>Demographic</b>                             |                  |                          |                  |                           |
| Age, y, Mean, (SD) range <sup>a</sup>          | 61.8 (8.1)       | 50-87                    | 62.3 (8.5)       | 50-92                     |
| <b>Socioeconomic</b>                           |                  |                          |                  |                           |
| <b>Wealth<sup>a</sup></b>                      |                  |                          |                  |                           |
| High                                           | 44.3             | (42.1; 46.6)             | 38.6***          | (39.6; 42.7)              |
| Middle                                         | 35.5             | (33.3; 37.4)             | 35.4             | (33.4; 37.4)              |
| Low                                            | 20.1             | (18.4; 22.1)             | 26.1***          | (24.3; 27.9)              |
| <b>Childhood SES<sup>a</sup></b>               |                  |                          |                  |                           |
| High                                           | 31.2             | (29.1; 33.0)             | 33.9             | (32.1; 35.9)              |
| Middle                                         | 32.8             | (30.7; 35.0)             | 30.0*            | (27.8; 31.5)              |
| Low                                            | 36.0             | (33.8; 38.2)             | 36.5             | (34.5; 38.4)              |
| <b>Education<sup>a</sup></b>                   |                  |                          |                  |                           |
| High                                           | 21.3             | (19.5; 23.3)             | 14.8***          | (13.4; 16.2)              |
| Middle                                         | 33.5             | (31.4; 35.7)             | 38.3***          | (36.4; 40.3)              |
| Low                                            | 45.2             | (42.9; 47.4)             | 46.9***          | (44.9; 49.0)              |
| <b>Health</b>                                  |                  |                          |                  |                           |
| CVD <sup>b</sup> % (95% CI)                    | 24.7             | (22.7; 26.7)             | 17.1***          | (15.6; 18.7)              |
| Diabetes <sup>b</sup> % (95% CI)               | 15.3             | (13.7; 17.0)             | 10.9***          | (9.7; 12.2)               |
| <b>Physical functioning</b>                    |                  |                          |                  |                           |
| ADL <sup>b</sup> % (95% CI)                    | 32.1             | (30.0; 34.2)             | 36.3**           | (34.4; 38.3)              |
| Poor mobility <sup>b</sup>                     | 13.2             | (11.7; 14.8)             | 16.7***          | (15.2; 18.3)              |
| <b>Health behaviours</b>                       |                  |                          |                  |                           |
| BMI <sup>c</sup>                               | 28.0             | (27.8; 28.1)             | 28.1             | (27.9; 28.3)              |
| Current smoker <sup>b</sup>                    | 16.6             | (14.9; 18.3)             | 16.9             | (15.4; 18.4)              |
| Daily alcohol consumption <sup>b</sup>         | 47.2             | (45.0; 49.5)             | 30.7***          | (28.9; 32.6)              |
| Physically inactive <sup>b</sup>               | 23.4             | (21.5; 25.4)             | 36.5***          | (34.5; 38.4)              |
| <b>Depression<sup>b</sup> % (95% CI)</b>       | 23.0             | (21.1; 25.0)             | 38.8***          | (38.9; 40.1)              |
| <b>Ever dementia<sup>b</sup></b>               | 1.2              | (0.7; 1.8)               | 1.1              | (0.7; 1.6)                |
| <b>Cognitive function measures<sup>b</sup></b> |                  |                          |                  |                           |
|                                                | <b>Mean (SD)</b> | <b>Range</b>             | <b>Mean (SD)</b> | <b>Range</b>              |
| <b>Memory</b>                                  |                  |                          |                  |                           |
| Original score                                 | 10.2 (3.1)       | 1-20                     | 10.6 (3.2)***    | 0-20                      |
| z-Transformed score                            | 0.26 (0.86)      | -2.3-3.0                 | 0.35 (0.88)      | -2.6-3.0                  |
| <b>Executive function</b>                      |                  |                          |                  |                           |
| Original score                                 | 21.5 (6.2)       | 10-48                    | 20.6 (5.9)***    | 0-44                      |
| z-Transformed score                            | 0.35 (1.02)      | -2.8-4.5                 | 0.22 (0.92)      | -3.0-3.9                  |
| <b>Processing speed</b>                        |                  |                          |                  |                           |
| Original score                                 | 18.9 (5.2)       | 2-56                     | 20.4 (5.4)***    | 0-63                      |
| z-Transformed score                            | 0.05 (0.9)       | -2.8-6.2                 | 0.30 (0.9)       | -3.1-7.5                  |

a. Measured at baseline. b. Ever reported between waves 1 to 5. c. Average between wave 0, wave 2 and wave 4. \*p<0.05 for the gender difference \*\*p<0.01 \*\*\*p<0.001

**Table S3. Results of the linear growth curve model for each cognitive function domain for the sample of completers, English Longitudinal Study of Ageing 2002-2003 to 2010-2011**

| Growth parameters                      | Memory<br>(Standardized score) <sup>a</sup> |         | Executive<br>(Standardized score) <sup>a</sup> |         | Processing speed<br>(Standardized score) <sup>a</sup> |         | Global Cognitive function<br>(Standardized score) <sup>a</sup> |         |
|----------------------------------------|---------------------------------------------|---------|------------------------------------------------|---------|-------------------------------------------------------|---------|----------------------------------------------------------------|---------|
|                                        | Estimate (se)                               | p-value | Estimate (se)                                  | p-value | Estimate (se)                                         | p-value | Estimate (se)                                                  | p-value |
| Intercept                              | 0.285 (0.017)                               | <0.001  | 0.351 (0.002)                                  | <0.001  | 0.021 (0.019)                                         | 0.261   | 0.000 (0.000)                                                  | na      |
| Intercept variance                     | 0.296 (0.013)                               | <0.001  | 0.467 (0.016)                                  | <0.001  | 0.418 (0.015)                                         | <0.001  | 0.209(0.011)                                                   | <0.001  |
| Slope                                  | -0.023 (0.005)                              | <0.001  | -0.017 (0.005)                                 | <0.010  | -0.050 (0.005)                                        | <0.001  | -0.032 (0.004)                                                 | <0.001  |
| Slope variance                         | 0.003 (0.001)                               | <0.001  | 0.012 (0.001)                                  | <0.001  | 0.009 (0.001)                                         | <0.001  | 0.003 (0.001)                                                  | <0.001  |
| <b>Intercept on</b>                    |                                             |         |                                                |         |                                                       |         |                                                                |         |
| Female                                 | 0.135 (0.023)                               | <0.001  | -0.112 (0.026)                                 | <0.001  | 0.295 (0.025)                                         | <0.001  | 0.098 (0.020)                                                  | <0.001  |
| Age                                    | -0.031 (0.001)                              | <0.001  | -0.026 (0.002)                                 | <0.001  | -0.019 (0.001)                                        | <0.001  | -0.030 (0.001)                                                 | <0.001  |
| <b>Slope on</b>                        |                                             |         |                                                |         |                                                       |         |                                                                |         |
| Female                                 | 0.013 (0.005)                               | <0.05   | 0.008 (0.007)                                  | 0.239   | 0.005 (0.006)                                         | 0.435   | 0.013 (0.005)                                                  | <0.010  |
| Age                                    | -0.005 (0.000)                              | <0.001  | -0.004 (0.000)                                 | <0.001  | -0.004 (0.000)                                        | <0.001  | -0.005 (0.000)                                                 | <0.001  |
| <b>Intercept and slope correlation</b> | 0.011 (0.003)                               | <0.001  | -0.003 (0.004)                                 | 0.349   | -0.018 (0.003)                                        | <0.001  | 0.007 (0.002)                                                  | 0.001   |
| <b>Model fit</b>                       |                                             |         |                                                |         |                                                       |         |                                                                |         |
| CFI                                    | 0.988                                       |         | 0.995                                          |         | 0.995                                                 |         | 0.975                                                          |         |
| TLI                                    | 0.985                                       |         | 0.994                                          |         | 0.994                                                 |         | 0.967                                                          |         |
| RMSEA                                  | 0.041                                       |         | 0.026                                          |         | 0.026                                                 |         | 0.036                                                          |         |
| N                                      | 4,157                                       |         | 4,157                                          |         | 4,157                                                 |         | 4,157                                                          |         |

a To the z-score, mean 0 and standard deviation 1. CFI = Comparative Fit Index. TLI = Tucker–Lewis index. RMSEA = root-mean-square error of approximation. Completers: those present at all measurement occasions with non-missing data on the CF tests at each given occasion.

**Fig.S1 Ageing-vector graphs showing the predicted 8-year trajectories of memory, executive function, processing speed and global cognitive function for men completers (n=1,825), English Longitudinal Study of Ageing 2002-2003 to 2010-11.**

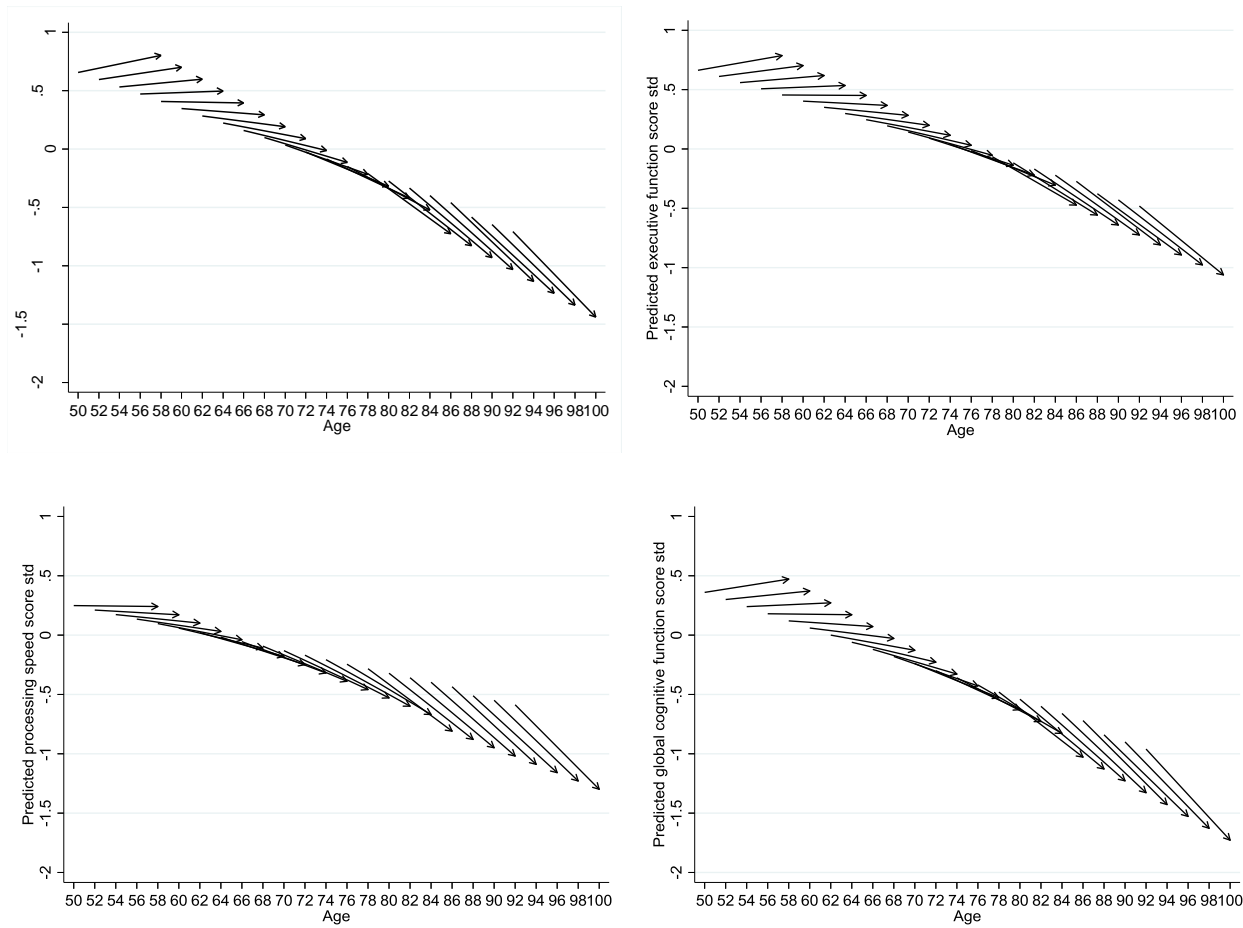

**Fig.S2 Ageing-vector graphs showing the predicted 8-year trajectories of memory, executive function, processing speed and global cognitive function for women completers (n=2,332), English Longitudinal Study of Ageing 2002-2003 to 2010-11.**

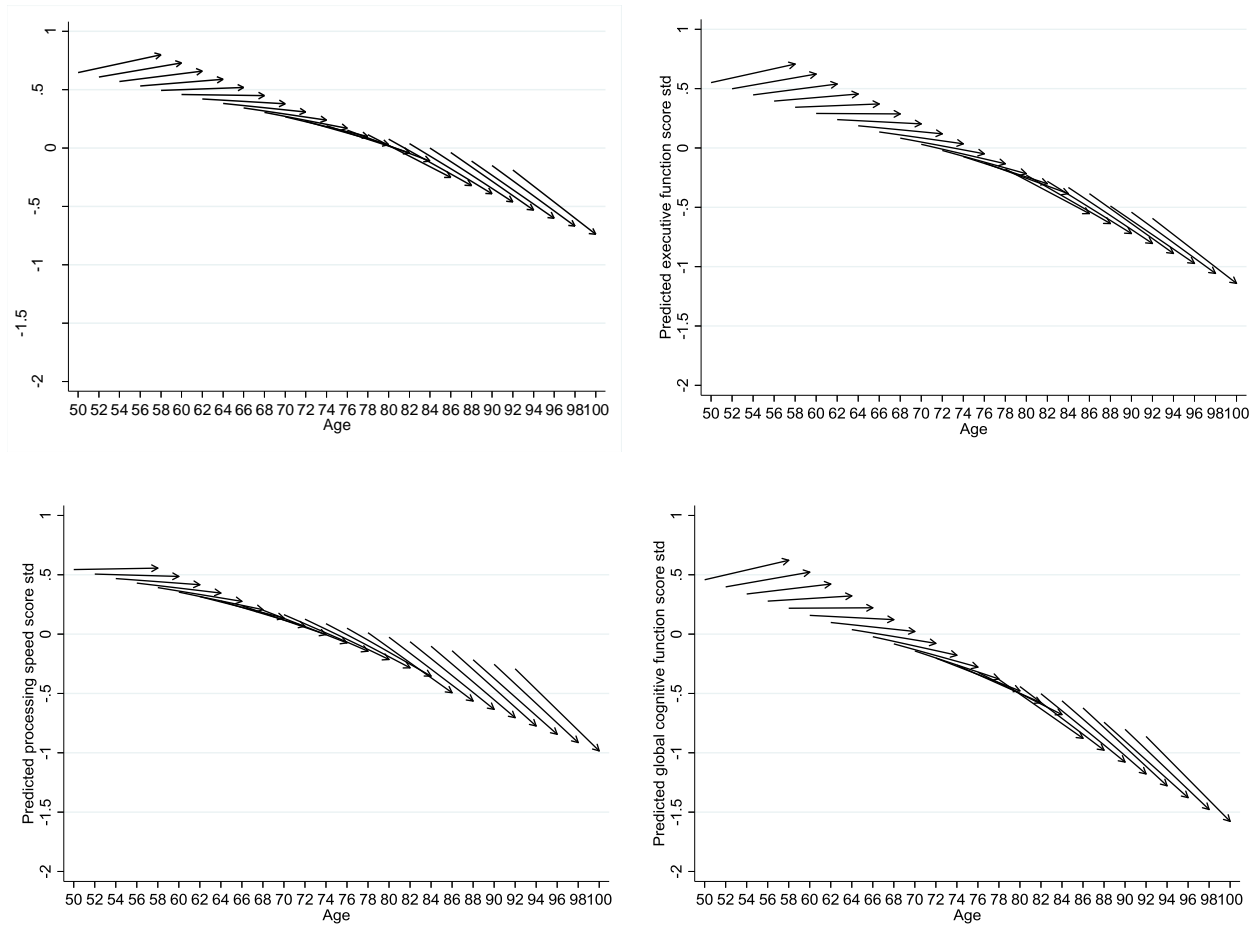

**Table S4 Predictors of intercepts and slopes of change of each cognitive function domain for the completers men (n=1825), the English Longitudinal Study of Ageing, 2002-2003 to 2010-2011**

| Covariate                           | Memory Intercept  | Memory Slope      | Executive function Intercept | Executive function Slope | Processing Speed Intercept | Processing Speed Slope | Global CF Intercept | Global CF Slope   |
|-------------------------------------|-------------------|-------------------|------------------------------|--------------------------|----------------------------|------------------------|---------------------|-------------------|
| <b>Demographic</b>                  |                   |                   |                              |                          |                            |                        |                     |                   |
| Age <sup>a</sup>                    | -0.026 (0.002)*** | -0.004 (0.001)*** | -0.020 (0.003)***            | -0.004 (0.000)***        | -0.017 (0.002)***          | -0.002 (0.000)***      | -0.025 (0.002)***   | -0.004 (0.000)*** |
| <b>Socioeconomic</b>                |                   |                   |                              |                          |                            |                        |                     |                   |
| Wealth (Middle) <sup>a</sup>        | -                 | -                 | -                            | -                        | -0.137 (0.041)**           | -                      | -                   | -                 |
| Wealth (Low) <sup>a</sup>           | -0.130 (0.049)**  | -                 | -                            | -                        | -0.158 (0.052)**           | -                      | -0.123 (0.042)**    | -                 |
| Childhood SES (Middle) <sup>a</sup> | -                 | -                 | -                            | -                        | -                          | -                      | -                   | -                 |
| Childhood SES (Low) <sup>a</sup>    | -                 | -                 | -0.104 (0.052)**             | 0.042 (0.016)**          | -                          | -                      | -                   | -                 |
| Education (Middle) <sup>a</sup>     | -0.106 (0.045)*   | -                 | -0.176 (0.056)**             | -                        | -0.158 (0.048)**           | -                      | -0.147 (0.038)***   | -                 |
| Education (Low) <sup>a</sup>        | -0.389 (0.048)*** | -                 | -0.419 (0.059)***            | -                        | -0.274 (0.051)***          | -                      | -0.413 (0.041)***   | 0.030 (0.009)**   |
| <b>Health</b>                       |                   |                   |                              |                          |                            |                        |                     |                   |
| CVD <sup>b</sup>                    | -                 | -                 | -                            | -                        | -                          | -                      | -                   | -                 |
| Diabetes <sup>b</sup>               | -                 | -                 | -                            | -                        | -                          | -                      | -                   | -                 |
| <b>Physical functioning</b>         |                   |                   |                              |                          |                            |                        |                     |                   |
| ADL <sup>b</sup>                    | -                 | -                 | -0.110 (0.048)*              | -                        | -                          | -                      | -0.073 (0.034)*     | -                 |
| Poor mobility <sup>b</sup>          | -                 | -                 | -                            | -                        | -                          | -                      | -                   | -                 |
| <b>Health Behaviors</b>             |                   |                   |                              |                          |                            |                        |                     |                   |
| BMI <sup>c</sup>                    | -                 | -                 | 0.012 (0.005)*               | -                        | -                          | -                      | -                   | -                 |
| Current smoker <sup>b</sup>         | -                 | -                 | -                            | -                        | -                          | -                      | -                   | -                 |
| Daily alcohol drinking <sup>b</sup> | -                 | -                 | 0.087 (0.053)*               | -                        | -                          | -                      | 0.062 (0.028)*      | -                 |
| Physically inactive <sup>b</sup>    | -0.147 (0.043)**  | -                 | -                            | -                        | -                          | -                      | -0.136 (0.037)***   | -                 |
| <b>Depression<sup>b</sup></b>       |                   |                   |                              |                          |                            |                        |                     |                   |
|                                     | -                 | -                 | -                            | -                        | -                          | -                      | -                   | -0.020 (0.009)*   |
| <b>Dementia<sup>b</sup></b>         |                   |                   |                              |                          |                            |                        |                     |                   |
|                                     | -0.419 (0.148)**  | -0.107 (0.043)*   | -                            | -0.244 (0.050)***        | -                          | -0.103 (0.042)*        | -0.277 (0.126)*     | -0.169 (0.032)*** |

\*\*\*p<0.001 \*\*p<0.01 \*p<0.05. Cognitive function domain scores are standardized to the z-score, mean 0 and standard deviation 1. All predictors were entered simultaneously.

a Measured at baseline. b Ever reported between waves 1 to 5. c Average between wave 0, wave 2 and wave 4. Cells with dashes represent non-significant effects.

**Table S5 Predictors of intercepts and slopes of change of each cognitive function domain for the completers women (n=2,332), the English Longitudinal Study of Ageing, 2002-2003 to 2010-2011**

| Covariate                           | Memory Intercept  | Memory Slope      | Executive function Intercept | Executive function Slope | Processing Speed Intercept | Processing Speed Slope | Global CF Intercept | Global CF Slope   |
|-------------------------------------|-------------------|-------------------|------------------------------|--------------------------|----------------------------|------------------------|---------------------|-------------------|
| <b>Demographic</b>                  |                   |                   |                              |                          |                            |                        |                     |                   |
| Age <sup>a</sup>                    | -0.024 (0.002)*** | -0.005 (0.001)*** | -0.020 (0.002)***            | -0.004 (0.001)***        | -0.013 (0.002)***          | -0.004 (0.001)***      | -0.023 (0.002)***   | -0.005 (0.001)*** |
| <b>Socioeconomic</b>                |                   |                   |                              |                          |                            |                        |                     |                   |
| Wealth (Middle) <sup>a</sup>        | -                 | -                 | -                            | -                        | -                          | -                      | -                   | -                 |
| Wealth (Low) <sup>a</sup>           | -0.168 (0.041)*** | -                 | -0.189 (0.046)***            | -                        | -                          | -                      | -0.171 (0.09)***    | -                 |
| Childhood SES (Middle) <sup>a</sup> | -                 | -                 | -                            | -                        | -                          | -                      | -                   | -                 |
| Childhood SES (Low) <sup>a</sup>    | -0.137 (0.037)*** | -                 | -0.153 (0.041)***            | -                        | -0.127 (0.031)***          | -                      | -0.154 (0.031)***   | -                 |
| Education (Middle) <sup>a</sup>     | -0.146 (0.0345)** | -                 | -0.277 (0.050)***            | -                        | -                          | -                      | -0.194 (0.038)***   | -                 |
| Education (Low) <sup>a</sup>        | -0.397 (0.047)*** | -                 | -0.527 (0.053)***            | -                        | -0.164 (0.056)**           | -                      | -0.440 (0.040)***   | -                 |
| <b>Health</b>                       |                   |                   |                              |                          |                            |                        |                     |                   |
| CVD <sup>b</sup>                    | -                 | -                 | -                            | -                        | -                          | -                      | -                   | -                 |
| Diabetes <sup>b</sup>               | -                 | -                 | -                            | -                        | -                          | -                      | -                   | -                 |
| <b>Physical functioning</b>         |                   |                   |                              |                          |                            |                        |                     |                   |
| ADL <sup>b</sup>                    | -                 | -                 | -                            | -                        | -                          | -                      | -                   | -                 |
| Poor mobility <sup>b</sup>          | -                 | -                 | -                            | -                        | -                          | -                      | -                   | -                 |
| <b>Health Behaviors</b>             |                   |                   |                              |                          |                            |                        |                     |                   |
| BMI <sup>c</sup>                    | -                 | -                 | 0.007 (0.003)*               | -                        | -                          | -                      | -                   | -                 |
| Current smoker <sup>b</sup>         | -                 | -                 | -                            | -                        | -                          | -0.033 (0.012)**       | -                   | -                 |
| Daily alcohol drinking <sup>b</sup> | 0.066 (0.032)*    | -                 | 0.112 (0.036)**              | -                        | -                          | -                      | 0.083 (0.027)**     | -                 |
| Physically inactive <sup>b</sup>    | -0.085 (0.032)*** | -                 | -0.149 (0.039)***            | -                        | -0.092 (0.041)*            | -                      | -0.118 (0.029)***   | -                 |
| <b>Depression<sup>b</sup></b>       |                   |                   |                              |                          |                            |                        |                     |                   |
| -                                   | -                 | -                 | -                            | -                        | -                          | -                      | -                   | -                 |
| <b>Dementia<sup>b</sup></b>         |                   |                   |                              |                          |                            |                        |                     |                   |
| -                                   | -0.541 (0.142)*** | -0.121 (0.042)**  | -                            | -0.137 (0.045)**         | -0.302 (0.072)***          | -0.080 (0.0030)**      | -0.421(0.118)***    | -0.014 (0.031)*   |

\*\*\*p<0.001 \*\*p<0.01 \*p<0.05. Cognitive function domain scores are standardized to the z-score, mean 0 and standard deviation 1. All predictors were entered simultaneously.  
a Measured at baseline. b Ever reported between waves 1 to 5. c Average between wave 0, wave 2 and wave 4. Cells with dashes represent non-significant effects.



**Table S6 Predictors of intercepts and slopes of change of each cognitive function domain for men aged 60 and over (n=3,025), the English Longitudinal Study of Ageing, 2002-2003 to 2010-2011**

| Covariate                           | Memory Intercept  | Memory Slope      | Executive function Intercept | Executive function Slope | Processing Speed Intercept | Processing Speed Slope | Global CF Intercept | Global CF Slope   |
|-------------------------------------|-------------------|-------------------|------------------------------|--------------------------|----------------------------|------------------------|---------------------|-------------------|
| <b>Demographic</b>                  |                   |                   |                              |                          |                            |                        |                     |                   |
| Age <sup>a</sup>                    | -0.027 (0.002)*** | -0.004 (0.000)*** | -0.017 (0.002)***            | -0.005 (0.002)***        | -0.019 (0.002)***          | -0.004 (0.001)***      | -0.025 (0.002)***   | -0.005 (0.001)*** |
| <b>Socioeconomic</b>                |                   |                   |                              |                          |                            |                        |                     |                   |
| Wealth (Middle) <sup>a</sup>        | -                 | -                 | -                            | -                        | -0.077 (0.036)*            | -                      | -                   | -                 |
| Wealth (Low) <sup>a</sup>           | -0.201 (0.039)*** | -                 | -0.165 (0.042)***            | -                        | -0.172 (0.038)***          | -                      | -0.209 (0.033)***   | -                 |
| Childhood SES (Middle) <sup>a</sup> | -                 | -                 | -                            | -                        | 0.080 (0.038)*             | -                      | -                   | -                 |
| Childhood SES (Low) <sup>a</sup>    | -                 | -                 | -0.114 (0.040)**             | -                        | -                          | -0.026 (0.013)*        | -                   | -                 |
| Education (Middle) <sup>a</sup>     | -0.207 (0.047)*** | -                 | -0.120 (0.051)*              | -                        | -                          | -                      | -0.169 (0.040)***   | -                 |
| Education (Low) <sup>a</sup>        | -0.401 (0.046)*** | 0.041 (0.016)*    | -0.270 (0.050)***            | -                        | -0.219 (0.047)***          | -                      | -0.357 (0.039)***   | 0.037 (0.013)**   |
| <b>Health</b>                       |                   |                   |                              |                          |                            |                        |                     |                   |
| CVD <sup>b</sup>                    | -                 | -                 | -                            | -                        | -                          | -                      | -                   | -                 |
| Diabetes <sup>b</sup>               | -                 | -                 | -                            | -                        | -                          | -                      | -                   | -                 |
| <b>Physical functioning</b>         |                   |                   |                              |                          |                            |                        |                     |                   |
| ADL <sup>b</sup>                    | -0.234 (0.034)*** | -                 | -0.219 (0.037)***            | -                        | -0.087 (0.035)*            | -                      | -0.222 (0.035)***   | -                 |
| Poor mobility <sup>b</sup>          | -                 | -                 | -                            | -                        | -                          | -                      | -                   | -                 |
| Gait speed <sup>c</sup>             | 0.607 (0.070)***  | -                 | 0.663 (0.076)***             | -                        | 0.545 (0.072)***           | -                      | 0.674 (0.060)***    | -                 |
| <b>Health Behaviors</b>             |                   |                   |                              |                          |                            |                        |                     |                   |
| BMI <sup>d</sup>                    | 0.009 (0.004)*    | -                 | 0.014 (0.004)**              | -                        | -                          | -                      | 0.010 (0.003)**     | -                 |
| Current smoker <sup>b</sup>         | -                 | -                 | -                            | -                        | -0.106 (0.041)*            | -                      | -                   | -                 |
| Daily alcohol drinking <sup>b</sup> | 0.078 (0.029)**   | -                 | 0.106 (0.031)***             | -                        | 0.086 (0.029)**            | -                      | 0.097 (0.024)***    | -0.017 (0.008)*   |
| Physically inactive <sup>b</sup>    | -0.075 (0.033)*   | -                 | -                            | -                        | -0.072 (0.034)*            | -                      | -0.064 (0.028)***   | -                 |
| <b>Depression<sup>b</sup></b>       |                   |                   |                              |                          |                            |                        |                     |                   |
|                                     | -                 | -                 | -                            | -                        | -                          | -                      | -                   | -0.021 (0.010)*   |
| <b>Dementia<sup>b</sup></b>         |                   |                   |                              |                          |                            |                        |                     |                   |
|                                     | -0.405 (0.069)*** | -0.173 (0.029)*** | -0.205 (0.075)**             | -0.225 (0.033)***        | -0.289 (0.071)***          | -0.089 (0.031)**       | -0.355 (0.058)***   | -0.196 (0.023)*** |

\*\*\*p<0.001 \*\*p<0.01 \*p<0.05. Cognitive function domain scores are standardized to the z-score, mean 0 and standard deviation 1. All predictors were entered simultaneously. a Measured at baseline. b Ever reported between waves 1 to 5. c Average between wave 1-5. d Average between wave 0, wave 2 and wave 4. Cells with dashes represent non-significant effects.

**Table S7 Predictors of intercepts and slopes of change of each cognitive function domain for women aged 60 and over (n=3,617), the English Longitudinal Study of Ageing, 2002-2003 to 2010-2011**

| Covariate                           | Memory Intercept  | Memory Slope      | Executive function Intercept | Executive function Slope | Processing Speed Intercept | Processing Speed Slope | Global CF Intercept | Global CF Slope   |
|-------------------------------------|-------------------|-------------------|------------------------------|--------------------------|----------------------------|------------------------|---------------------|-------------------|
| <b>Demographic</b>                  |                   |                   |                              |                          |                            |                        |                     |                   |
| Age <sup>a</sup>                    | -0.036 (0.002)*** | -0.004 (0.001)*** | -0.022 (0.002)***            | -0.004 (0.001)***        | -0.025 (0.002)***          | -0.003 (0.001)***      | -0.032 (0.002)***   | -0.005 (0.002)*** |
| <b>Socioeconomic</b>                |                   |                   |                              |                          |                            |                        |                     |                   |
| Wealth (Middle) <sup>a</sup>        | -                 | -                 | -                            | -                        | -                          | -                      | -0.061 (0.016)*     | -                 |
| Wealth (Low) <sup>a</sup>           | -0.160 (0.037)*** | -                 | -0.150 (0.036)***            | -                        | -0.098 (0.042)*            | -                      | -0.161 (0.031)***   | -                 |
| Childhood SES (Middle) <sup>a</sup> | -0.141 (0.035)**  | -                 | -0.124 (0.034)**             | -                        | -                          | -                      | -0.131 (0.029)**    | -                 |
| Childhood SES (Low) <sup>a</sup>    | -0.175 (0.035)*** | -                 | -0.156 (0.034)***            | -                        | -0.144 (0.039)***          | -                      | -0.178 (0.029)***   | 0.024 (0.010)*    |
| Education (Middle) <sup>a</sup>     | -0.106 (0.047)**  | -                 | -0.240 (0.046)***            | -                        | -                          | -                      | -0.174 (0.039)***   | -                 |
| Education (Low) <sup>a</sup>        | -0.297 (0.047)*** | -                 | -0.395 (0.046)***            | -                        | -0.125 (0.054)*            | -                      | -0.344 (0.040)***   | -                 |
| <b>Health</b>                       |                   |                   |                              |                          |                            |                        |                     |                   |
| CVD <sup>b</sup>                    | -                 | -                 | -                            | -                        | -                          | -                      | -                   | -                 |
| Diabetes <sup>b</sup>               | -                 | -                 | -                            | -                        | -                          | -                      | -                   | -                 |
| <b>Physical functioning</b>         |                   |                   |                              |                          |                            |                        |                     |                   |
| ADL <sup>b</sup>                    | -0.154 (0.033)*** | -                 | -0.148 (0.032)***            | -                        | -0.102 (0.037)**           | -                      | -0.159 (0.028)***   | -0.019 (0.009)*   |
| Mobility <sup>b</sup>               | -                 | -                 | -                            | -                        | -                          | -                      | -                   | -                 |
| Gait speed <sup>c</sup>             | 0.587 (0.069)***  | -                 | 0.542 (0.067)***             | -                        | 0.595 (0.078)***           | -                      | 0.630 (0.058)***    | -                 |
| <b>Health Behaviors</b>             |                   |                   |                              |                          |                            |                        |                     |                   |
| BMI <sup>d</sup>                    | -                 | -                 | 0.009 (0.003)**              | -                        | -                          | -                      | 0.006 (0.002)*      | -                 |
| Current smoker <sup>b</sup>         | -                 | -                 | -                            | -                        | -                          | -                      | -                   | -0.025 (0.011)*   |
| Daily alcohol drinking <sup>b</sup> | 0.070 (0.031)*    | -                 | 0.073 (0.030)*               | -                        | -                          | -                      | 0.063 (0.026)*      | -                 |
| Physically inactive <sup>b</sup>    | -                 | -0.034 (0.009)**  | -                            | -0.027 (0.012)*          | -                          | -                      | -                   | -0.029 (0.009)**  |
| <b>Depression<sup>b</sup></b>       |                   |                   |                              |                          |                            |                        |                     |                   |
|                                     | -                 | -                 | -                            | -0.021 (0.010)*          | -                          | -                      | -                   | -0.017 (0.008)*   |
| <b>Dementia<sup>b</sup></b>         |                   |                   |                              |                          |                            |                        |                     |                   |
|                                     | -0.476 (0.063)*** | -0.183 (0.028)*** | -0.239 (0.062)***            | -0.209 (0.028)***        | -0.302 (0.072)***          | -0.080 (0.031)**       | -0.393 (0.053)***   | -0.201 (0.022)*** |

\*\*\*p<0.001 \*\*p<0.01 \*p<0.05. Cognitive function domain scores are standardized to the z-score, mean 0 and standard deviation 1. All predictors were entered simultaneously. a Measured at baseline. b Ever reported between waves 1 to 5. c Average between wave 1-5. d Average between wave 0, wave 2 and wave 4. Cells with dashes represent non-significant effects.
